# Supplementary material for: Tetragonal tungsten bronze type Sn(ii)-based quaternary oxides: a new class of visible-light-absorbing semiconductors for photoelectrochemical water oxidation
Source: Royal Society of Chemistry journal article supplement (doi:10.1039/d1ta05809f), 2021-01-01
Supplement: d1ta05809f1.pdf [file d1ta05809f1.pdf]

## **Supporting information**

# **Tetragonal Tungsten Bronze Type Sn(II)-Based Quaternary Oxides: A New Type of Visible-Light- Absorbing Semiconductors for Photoelectrochemical Water Oxidation**

Yalong Zou<sup>a,#</sup>, Jiabo Le<sup>a,#</sup>, Yufeng Cao<sup>a</sup>, Na An<sup>a</sup>, Yang Zhou<sup>a</sup>, Jianming Li<sup>c</sup>,

Deyu Liu<sup>a,b,\*</sup> and Yongbo Kuang<sup>a,b\*</sup>

- a. Ningbo Institute of Materials Technology and Engineering, Chinese Academy of Sciences, Ningbo 315201, Zhejiang, China*
- b. Center of Materials Science and Optoelectronics Engineering, University of Chinese Academy of Sciences, Beijing 100049, China*
- c. Research Center of New Energy, Research Institute of Petroleum Exploration & Development (RIPED), PetroChina, Beijing, 100083, China*

# These authors contributed equally to this work.

## **Author Information**

### **Corresponding Authors:**

Deyu Liu – Ningbo Institute of Materials Technology and Engineering, Chinese Academy of Sciences, Ningbo 315201, China; Center of Materials Science and Optoelectronics Engineering, University of Chinese Academy of Sciences, Beijing 100049, China; Email: [liudeyu@nimte.ac.cn](mailto:liudeyu@nimte.ac.cn)

Yongbo Kuang – Ningbo Institute of Materials Technology and Engineering, Chinese Academy of Sciences, Ningbo 315201, China; Center of Materials Science and Optoelectronics Engineering, University of Chinese Academy of Sciences, Beijing 100049, China; [orcid.org/0000-0002-0079-3720](https://orcid.org/0000-0002-0079-3720); Phone: +86-574-86686931; Email: [kuangyongbo@nimte.ac.cn](mailto:kuangyongbo@nimte.ac.cn)

## Results and Discussion

Table S1 Mesophase identification and corresponding synthesis conditions

| Sample                  | Amount of K <sub>2</sub> CO <sub>3</sub> (mmol) | Synthesis temperature (°C) |
|-------------------------|-------------------------------------------------|----------------------------|
| <b>K-Pyro-900-1.2 *</b> | 1.2                                             | 900                        |
| K-TTB-1100-1.2          | 1.2                                             | 1100                       |
| K-TTB-1300-1.2          | 1.2                                             | 1300                       |
| K-TTB-1300-1.5          | 1.5                                             | 1300                       |
| <b>K-TTB-1300-2.0 *</b> | 2.0                                             | 1300                       |
| K-TTB-1300-2.2          | 2.2                                             | 1300                       |

**Footnote:** The two samples marked with \* represent the two samples (Pyro and TTB) appearing in the maintext and the following tables and figures.

Table S2 XRF profile of K-TTB

| Element        | Wt %  | Atomic percent |
|----------------|-------|----------------|
| K              | 17.9  | 50.3           |
| Ta             | 59.5  | 36.2           |
| W              | 22.6  | 13.5           |
| Total content: | 100.0 | 100.0          |

Table S3 XRF profile of K-Pyro

| Element        | Wt %  | Atomic percent |
|----------------|-------|----------------|
| K              | 10.3  | 34.5           |
| Ta             | 41.6  | 30.6           |
| W              | 48.3  | 34.9           |
| Total content: | 100.0 | 100.0          |

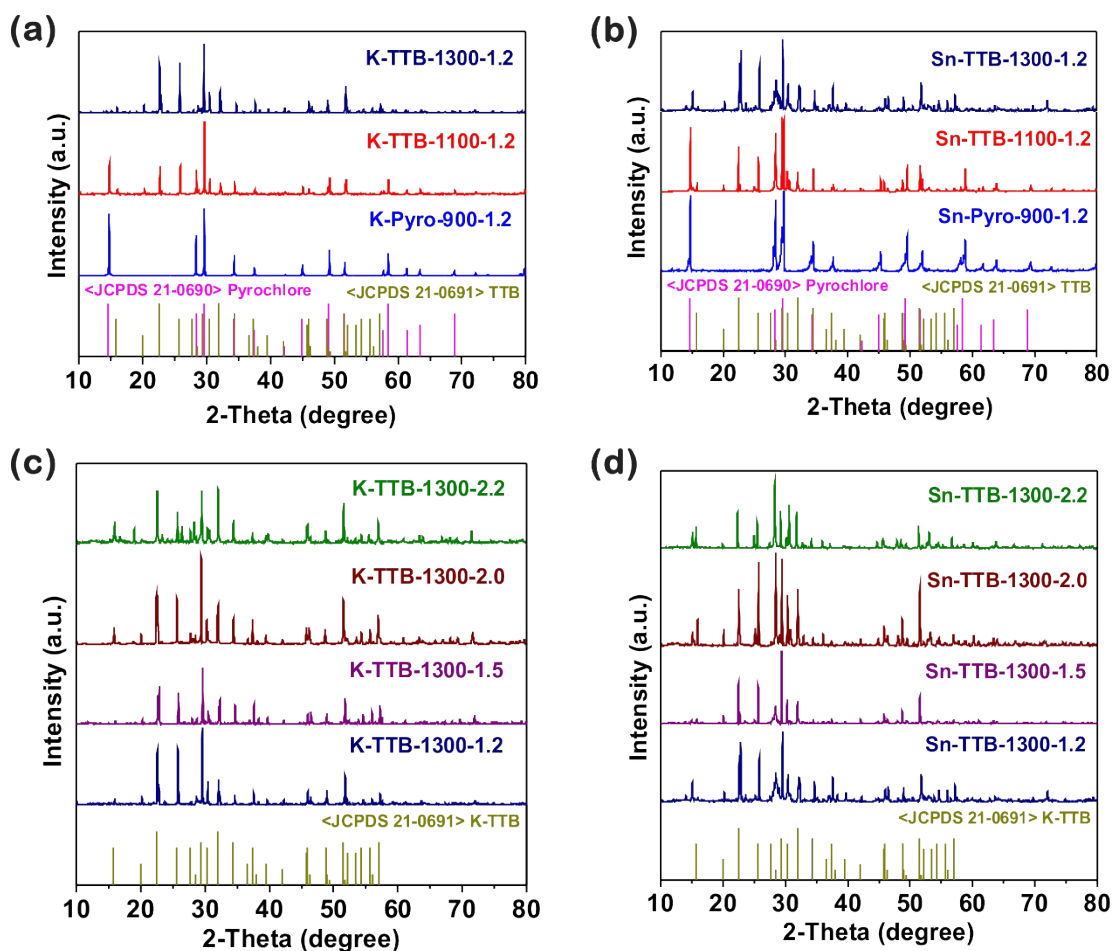

**Figure S1.** XRD patterns of K-precursors and Sn-products, (a, c) K-Pyro and K-TTB, (b, d) Sn-Pyro and Sn-TTB. The K-precursors were synthesized by the solid-state reaction under different temperatures and raw ratios.

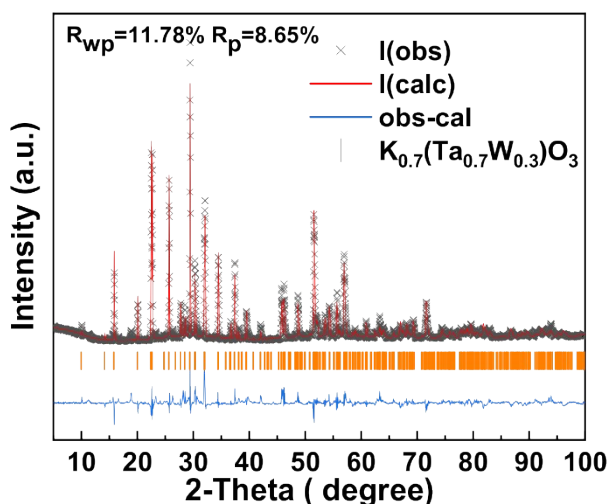

**Figure S2.** Rietveld refinement of K-TTB ( $K_{0.7}(Ta_{0.7}W_{0.3})O_3$ , Tetragonal, P 4/m b m): experimental data (black), simulated diffraction (red), position of observed diffractions (orange), and residual plot (blue).

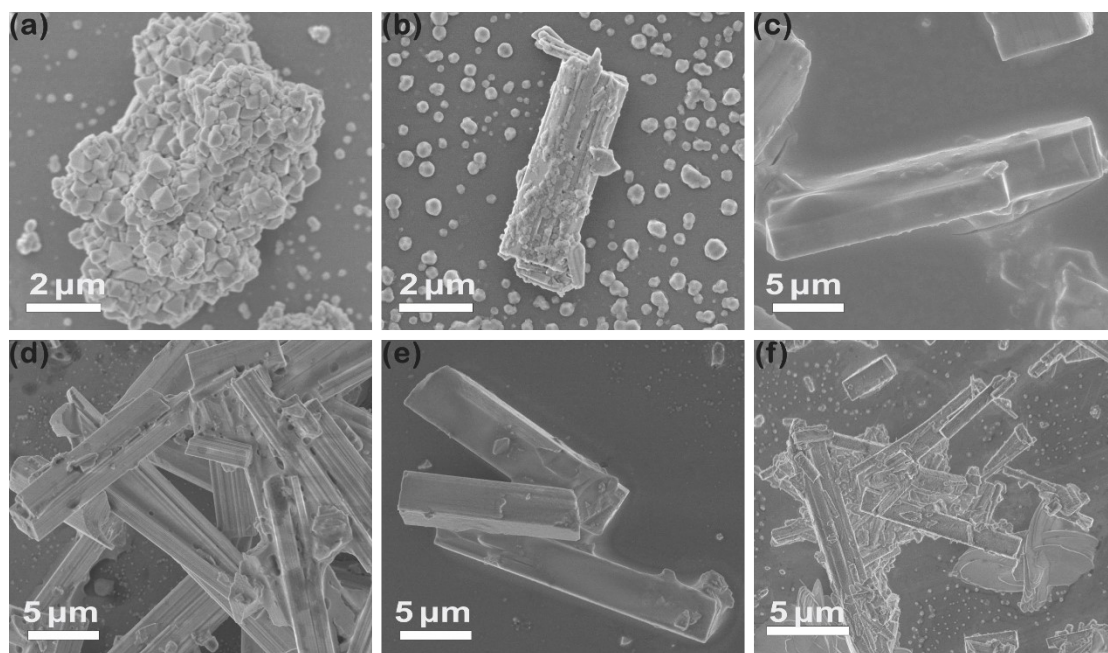

**Figure S3.** SEM images of K- precursors prepared at different temperatures and with varied K/Ta ratios, (a) K-Pyro-900-1.2, (b) K-TTB-1100-1.2, (c) K-TTB-1300-1.2, (d) K-TTB-1300-1.5, (e) K-TTB-1300-2.0, (f) K-TTB-1300-2.2.

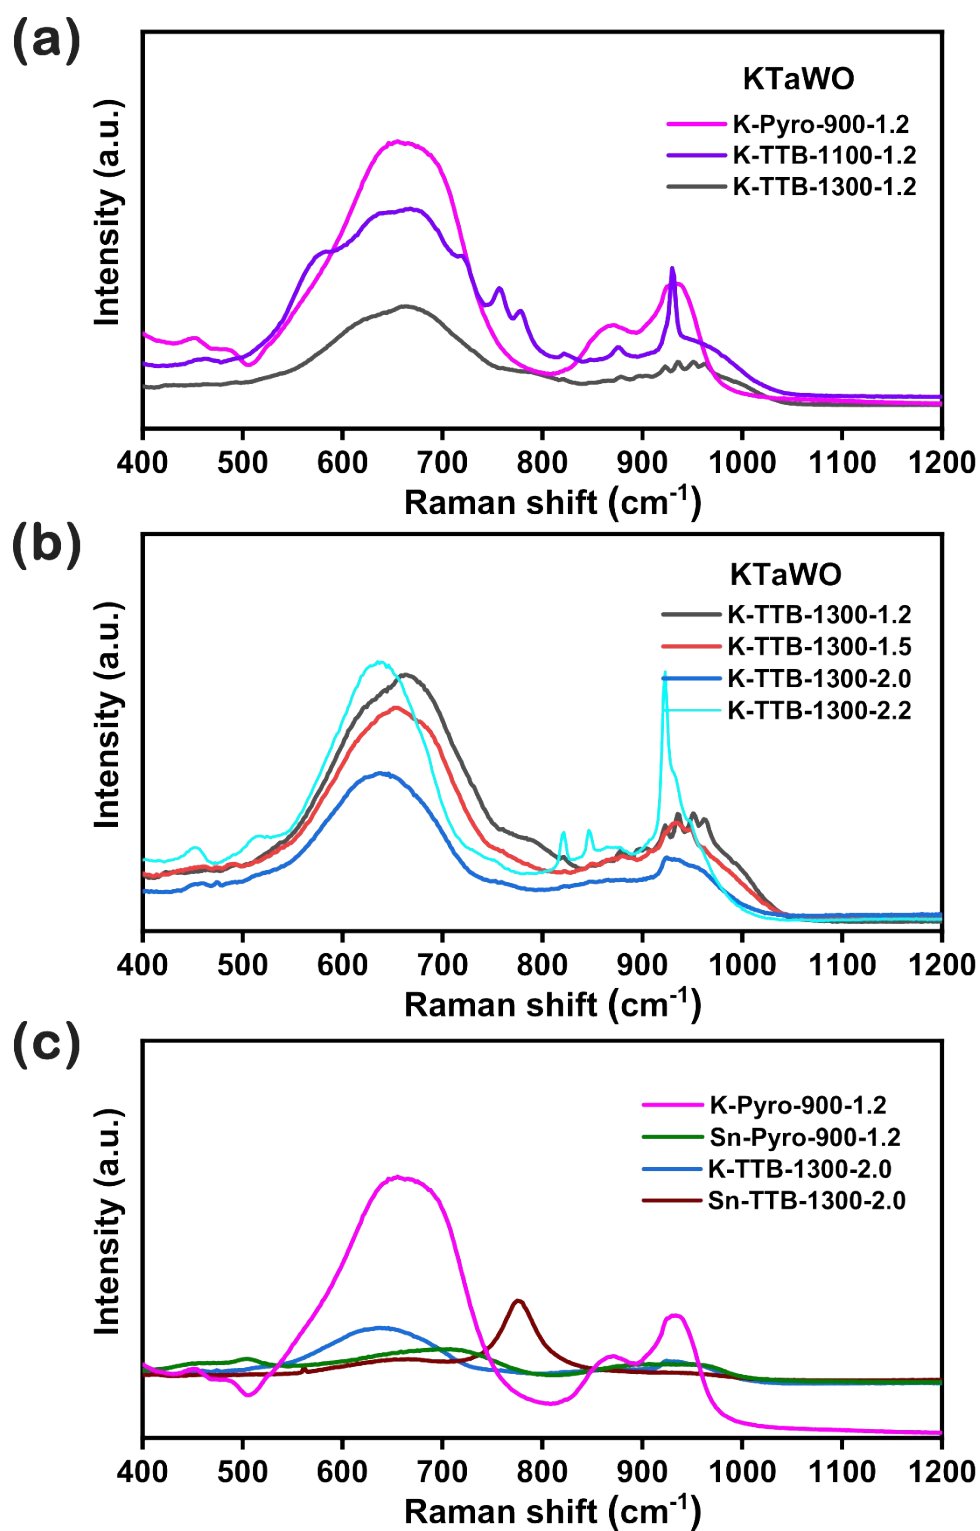

**Figure S4.** Raman spectra showing the vibrational features of the K-Pyro and K-TTB intermediates prepared at different temperatures and with varied K/Ta ratios and the corresponding Sn(II) ion exchanged products; measurements performed with powder samples stimulated by 532 nm laser.

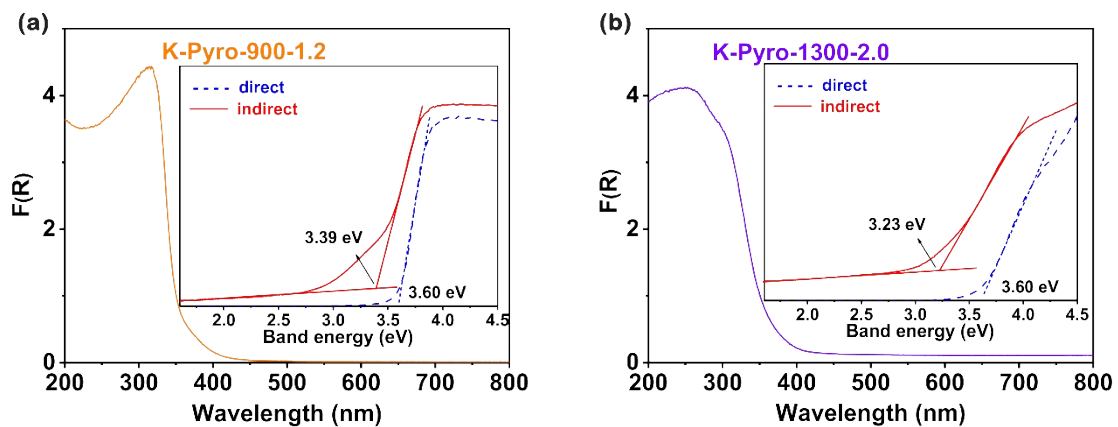

**Figure S5.** UV-visible diffuse reflectance spectra (DRS) of K-Pyro and K-TTB prepared at different temperatures and with varied K/Ta ratios and the corresponding Tauc plot.

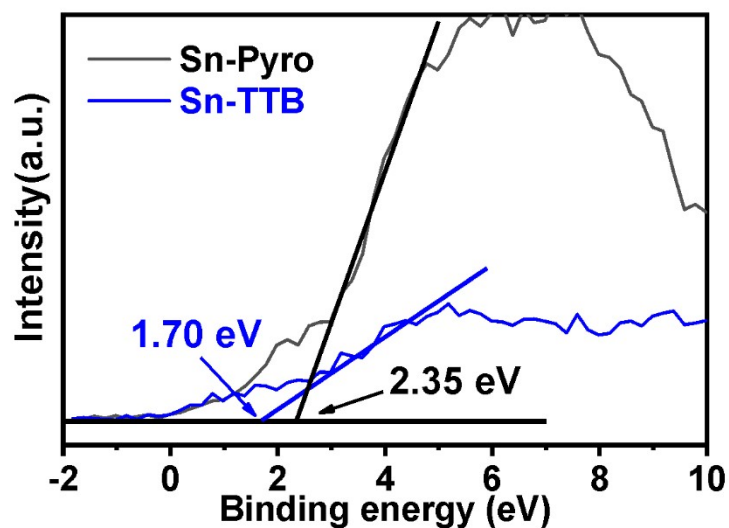

**Figure S6.** The valence band XPS spectra (VB-XPS) of Sn-Pyro and Sn-TTB.

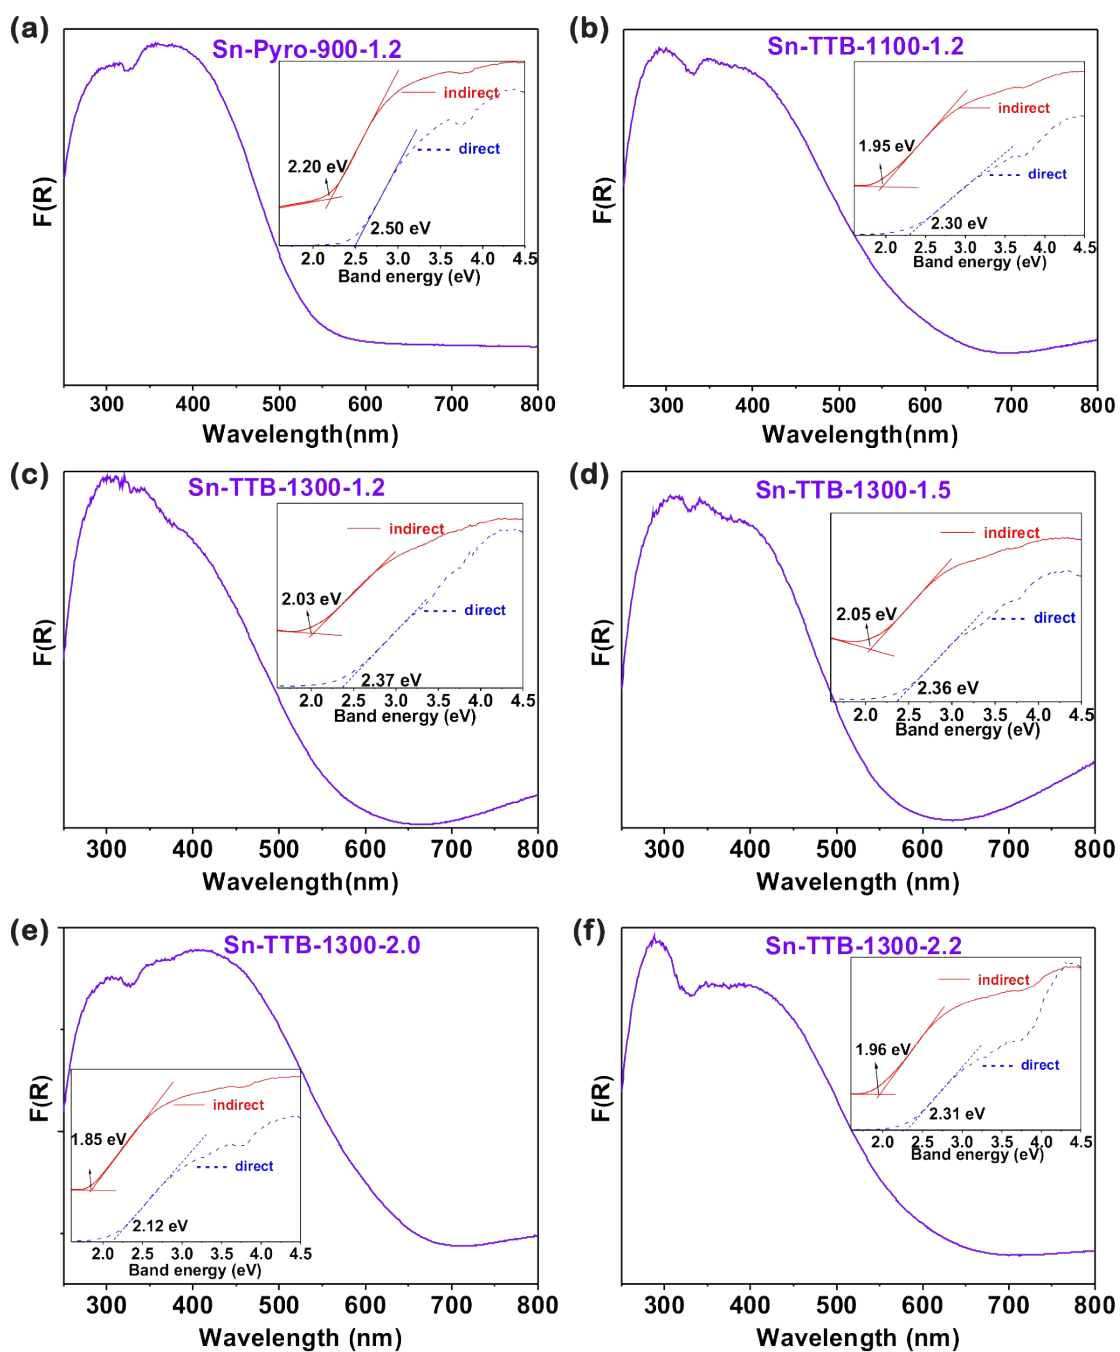

**Figure S7.** UV-visible diffuse reflectance spectra (DRS) of Sn-Pyro and Sn-TTB prepared at different temperatures and with varied K/Ta ratios and the corresponding Tauc plot.

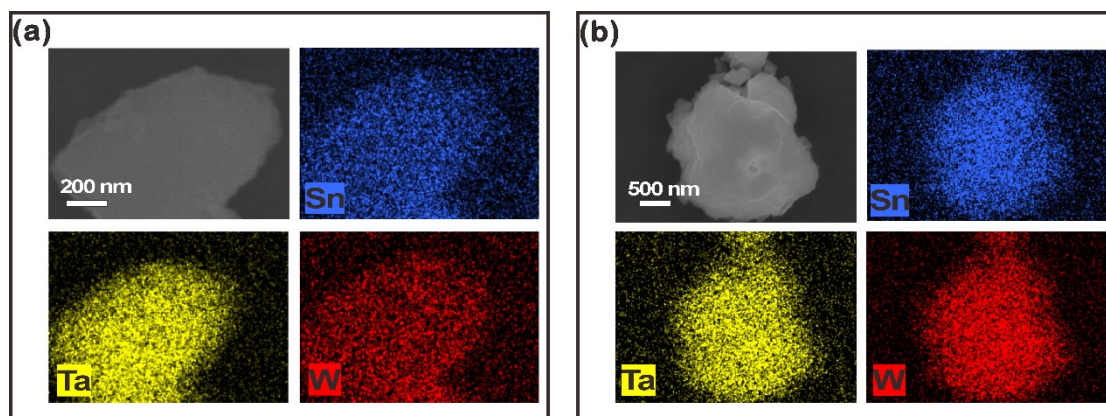

**Figure S8.** SEM images of EDS face scanning profile of the (a) Sn-TTB and (b) Sn-Pyro.

Table S4 XRF profile of Sn-TTB

| Element        | Wt %  | Atomic percent |
|----------------|-------|----------------|
| Sn             | 19.0  | 26.5           |
| Ta             | 39.9  | 36.5           |
| W              | 41.1  | 37.0           |
| Total content: | 100.0 | 100.0          |

Table S5 XRF profile of Sn-Pyro

| Element        | Wt %  | Atomic percent |
|----------------|-------|----------------|
| Sn             | 16.0  | 22.7           |
| Ta             | 38.8  | 36.0           |
| W              | 45.2  | 41.3           |
| Total content: | 100.0 | 100.0          |



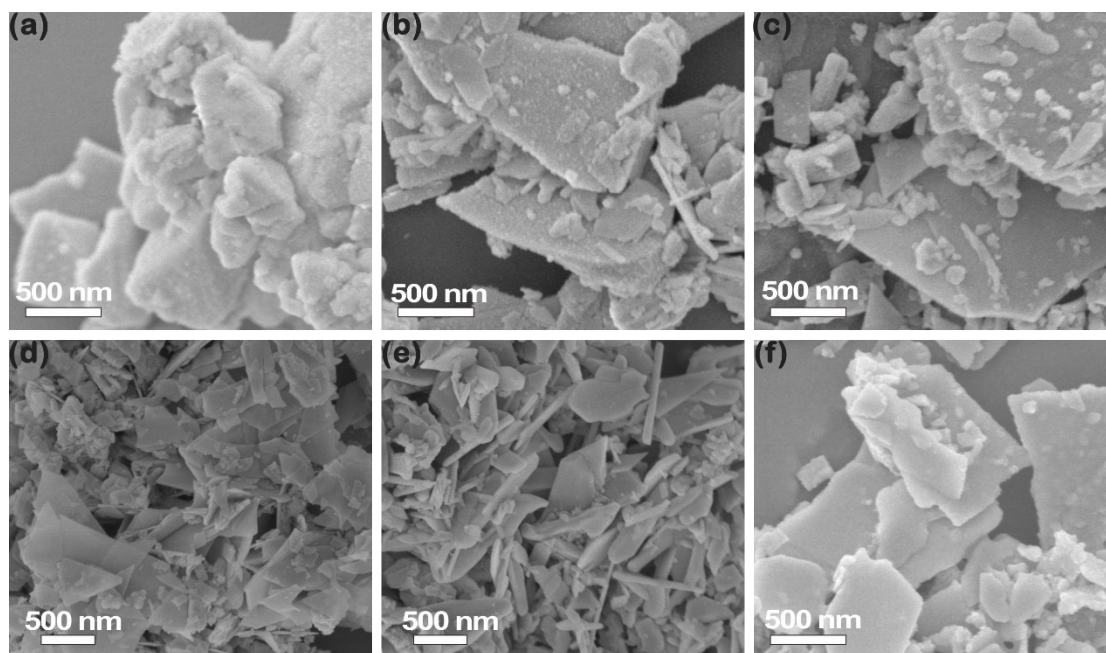

**Figure S9.** SEM image of Sn- products prepared at different temperatures and with varied K/Ta ratios, (a) Sn-Pyro-900-1.2, (b) Sn-TTB-1100-1.2, (c) Sn-TTB-1300-1.2, (d) Sn-TTB-1300-1.5, (e) Sn-TTB-1300-2.0, (f) Sn-TTB-1300-2.2.

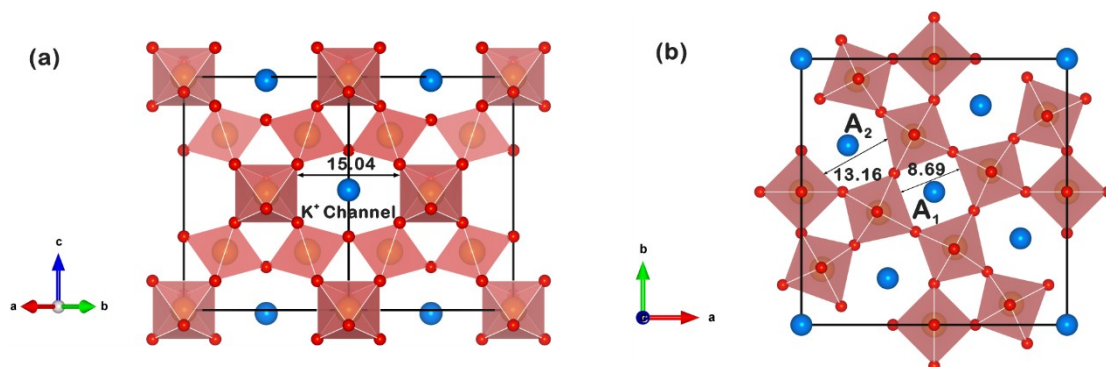

**Figure S10.** Unit cell structures of K-Pyro (left) and K-TTB (right). Color code: K (blue), Ta/W (orange), and O (red). The cross-sectional area of K channel in K-Pyro structure is about 15.04 ( $\text{\AA}^2$ ), the cross-sectional area of A<sub>1</sub>, A<sub>2</sub> site in K-TTB structure are 8.69 and 13.16 ( $\text{\AA}^2$ ), respectively.

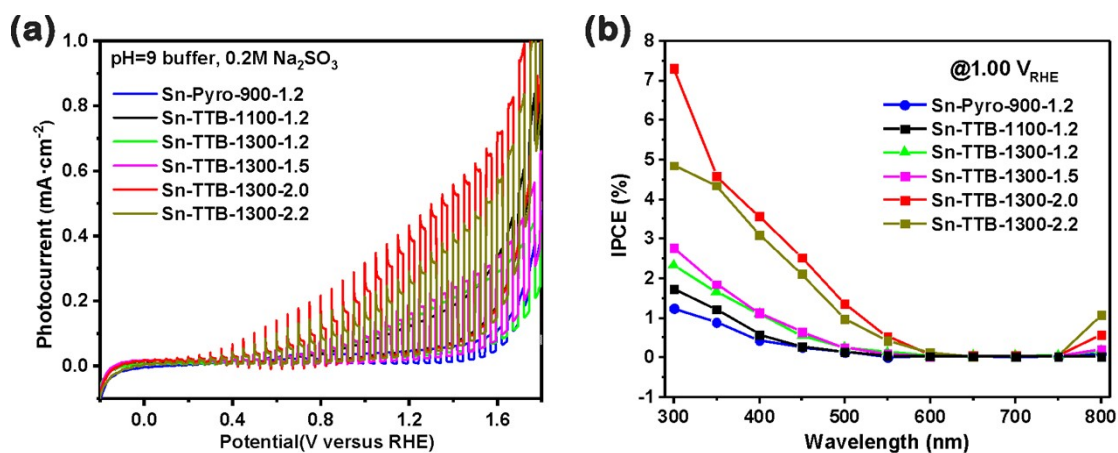

**Figure S11.** (a) Photocurrent density-potential curves of Sn-Pyro and Sn-TTB products under a chopping AM1.5G illumination, 100 mW/cm<sup>2</sup>, with 0.2 M Na<sub>2</sub>SO<sub>3</sub> as the hole scavenger. (b) The incident photon-to-current conversion efficiencies (IPCEs) of Sn-Pyro and Sn-TTB products were measured at 1.00 V<sub>RHE</sub>.

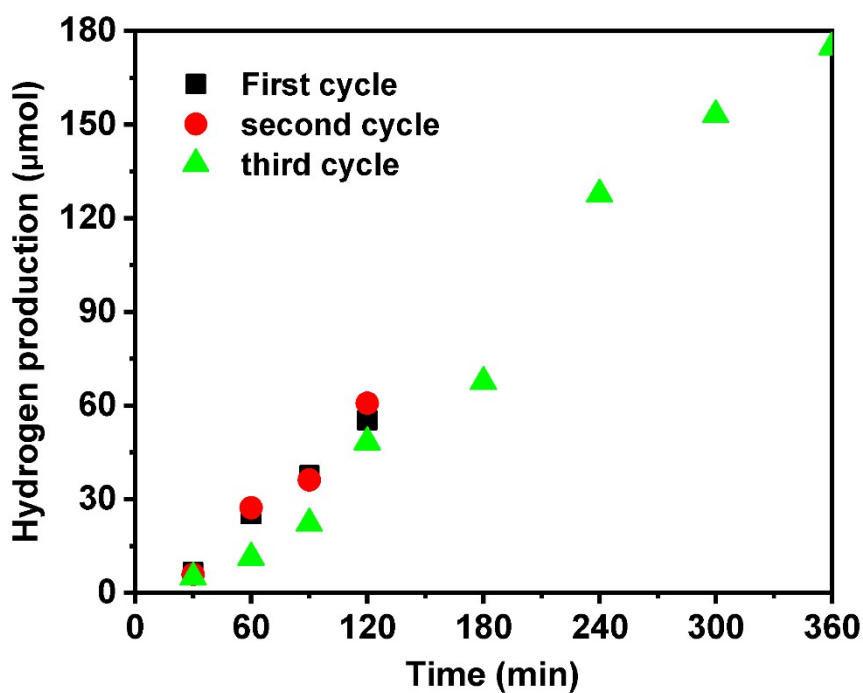

**Figure S12.** hydrogen evolution detected by gas chromatography in three cycles. All measurements were carried out in a 0.5 M potassium borate electrolyte (pH 9.0) under AM1.5 illumination, 100 mW/cm<sup>2</sup>.

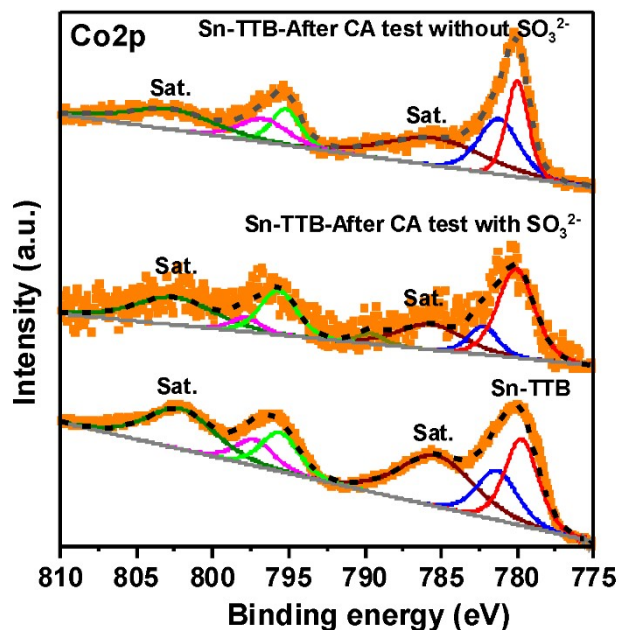

**Figure S13.** Co2p orbital XPS spectra of Sn-TTB sample (pristine and after CA test). Lorentzian peaks with areas and width constrained were used for fitting core levels of different spins.

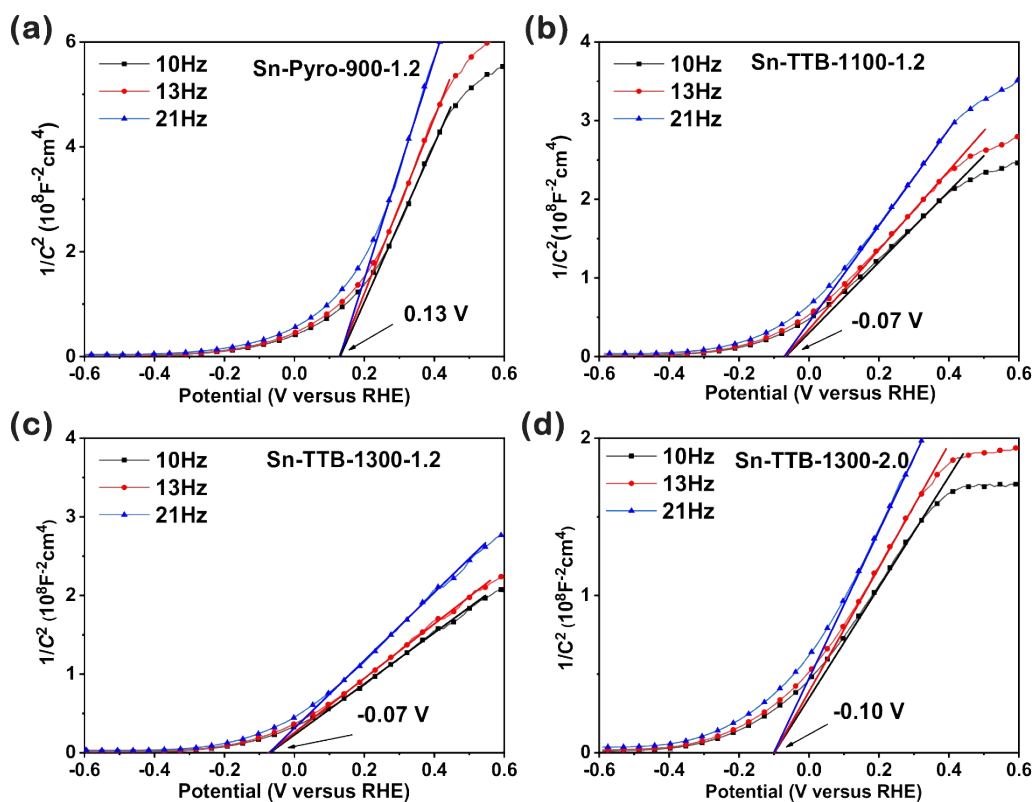

**Figure S14.** Mott-Schottky plots of (a) Sn-Pyro-900-1.2, (b) Sn-TTB-1100-1.2, (c) Sn-TTB-1300-1.2, (d) Sn-TTB-1300-2.0. The electrochemical tests were performed under aqueous KOH/H<sub>3</sub>BO<sub>3</sub> (0.5 M, pH=9.0) buffer in the dark, with a multi-sine data collection mode.

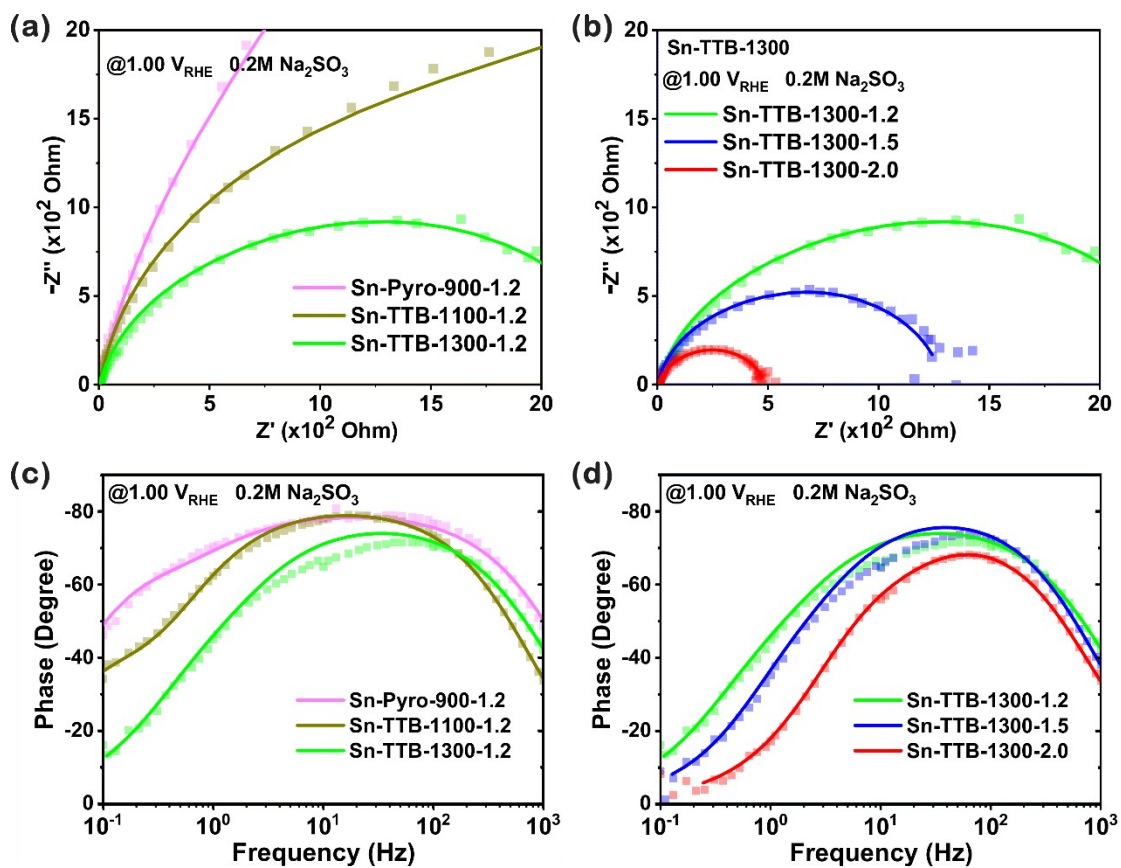

**Figure S15.** Electrochemical impedance spectra (EIS) measurements. (a,b) The EIS spectra and (c,d) The phase plots of the Sn-Products. The electrochemical tests were performed under aqueous KOH/H<sub>3</sub>BO<sub>3</sub> (0.5 M, pH=9.0) buffer with 0.2 M Na<sub>2</sub>SO<sub>3</sub> in the presence of LED 455nm light, 39mW/cm<sup>2</sup>. All the samples were decorated with CoOx.

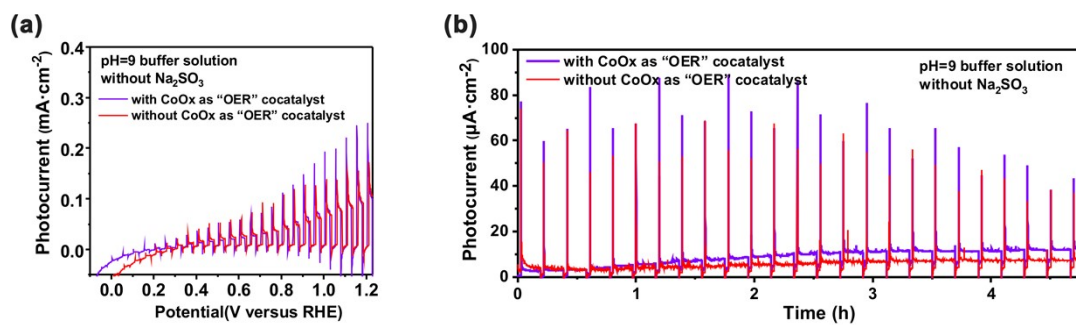

**Figure S16.** (a) Photocurrent density-potential curves of Sn-TTB products with and without CoOx as “OER” cocatalyst in the absence of the  $\text{Na}_2\text{SO}_3$  as the hole scavenger with chopping AM1.5G illumination,  $100\text{ mW}/\text{cm}^2$ . (b) The PEC stability tests of Sn-TTB products with and without CoOx as “OER” cocatalyst in the absence of hole scavenger by chronoamperometric (CA) graphs were measured at  $1.00V_{\text{RHE}}$  with chopping AM1.5G illumination,  $100\text{ mW}/\text{cm}^2$ .
